# Supplementary material for: Accumulation of Gene Polymorphisms Related to Plaque Disruption and Thrombosis Is Associated With Cerebral Infarction in Subjects With Type 2 Diabetes
Source: PubMed Central journal article supplement — Diabetes Care. 2009 Nov 23;33(2):390–5. doi: 10.2337/dc09-1518 (PMC2809289; doi:10.2337/dc09-1518), 2009-11-23
Supplement: supp_dc09-1518_dc09-1518_online_appendix.pdf [file supp_dc09-1518_dc09-1518_online_appendix.pdf]

Supplementary Table 1

Clinical characteristics of the subjects divided in three genotype groups according to the number of pro-atherothrombotic alleles

| <i>C-1562T</i> polymorphism of the <i>MMP9</i> gene | Total       | C/C         | C/T        | T/T        | Associations with the polymorphism |                 |                |
|-----------------------------------------------------|-------------|-------------|------------|------------|------------------------------------|-----------------|----------------|
|                                                     | (n = 3094)  | (n = 2145)  | (n = 867)  | (n = 82)   | Dominant model                     | Recessive model | Additive model |
| Gender (female / male)                              | 1154 / 1940 | 816 / 1329  | 310 / 557  | 28 / 54    | NS                                 | NS              | NS             |
| Age (years)                                         | 61.5 ± 8.4  | 61.7 ± 8.3  | 61.0 ± 8.4 | 61.6 ± 8.5 | NS                                 | NS              | NS             |
| Duration (years)                                    | 8.0 ± 7.5   | 8.2 ± 7.7   | 7.5 ± 7.1  | 7.5 ± 8.0  | NS                                 | NS              | NS             |
| Smoking (B.I. ≥200)                                 | 1522 (49.2) | 1058 (49.3) | 425 (49.0) | 39 (47.6)  | NS                                 | NS              | NS             |
| Body mass index (kg/m <sup>2</sup> )                | 24.1 ± 3.5  | 24.1 ± 3.5  | 24.3 ± 3.4 | 24.2 ± 3.6 | NS                                 | NS              | NS             |
| HbA <sub>1c</sub> (%)                               | 7.1 ± 1.2   | 7.0 ± 1.3   | 7.1 ± 1.2  | 7.0 ± 1.1  | NS                                 | NS              | NS             |
| Presence of hypertension (%)                        | 2352 (76.0) | 1607 (74.9) | 678 (78.2) | 67 (81.7)  | NS                                 | NS              | NS             |
| Presence of dyslipidemia (%)                        | 2356 (76.1) | 1638 (76.3) | 656 (75.7) | 62 (75.6)  | NS                                 | NS              | NS             |
| Treatment approach for diabetes                     |             |             |            |            |                                    |                 |                |
| Diet alone                                          | 541 (17.5)  | 363 (16.9)  | 165 (19.0) | 15 (18.3)  | NS                                 | NS              | NS             |
| Using OHA                                           | 1793 (58.0) | 1243 (57.9) | 507 (58.5) | 43 (52.4)  | NS                                 | NS              | NS             |
| Sulfonylureas                                       | 1097 (35.5) | 757 (35.3)  | 311 (35.9) | 29 (35.4)  | NS                                 | NS              | NS             |
| Thiazolidinediones                                  | 368 (11.9)  | 260 (12.1)  | 101 (11.6) | 7 (8.5)    | NS                                 | NS              | NS             |
| Biguanides                                          | 1069 (34.6) | 757 (35.3)  | 290 (33.4) | 22 (26.8)  | NS                                 | NS              | NS             |
| Using insulin                                       | 760 (24.6)  | 539 (25.1)  | 196 (22.6) | 25 (30.5)  | NS                                 | NS              | NS             |
| Treatment approach for dyslipidemia                 |             |             |            |            |                                    |                 |                |
| Using statins                                       | 848 (28.9)  | 619 (28.9)  | 247 (28.5) | 28 (34.1)  | NS                                 | NS              | NS             |
| Using other drugs                                   | 162 (5.2)   | 110 (5.1)   | 48 (5.5)   | 4 (4.9)    | NS                                 | NS              | NS             |
| Presence of cerebral infarction (%)                 | 322 (10.4)  | 211 (9.8)   | 100 (11.5) | 11 (13.4)  | NS                                 | NS              | NS             |

Data are shown as numbers (%) or means ± SD. In the dominant and the recessive genetic models, quantitative data between 2 groups were compared by the 2-tailed unpaired *t* test and categorical data were analyzed with the  $\chi^2$  test. In the additive genetic model, the associations between the polymorphism and variables were evaluated with one-way ANOVA or the Mantel extension test. Bonferroni's multiple comparison procedure was utilized for the correction and gave the corrected level of significance, 0.0042.

Abbreviations; NS; not significant; B.I., Brinkman's Index; OHA, oral hypoglycemic agent.

Supplementary Table 2

Clinical characteristics of the subjects divided in three genotype groups according to the number of pro-atherothrombotic alleles

| <i>C46T</i> polymorphism of the <i>F12</i> gene | Total<br>(n = 3094) | T/T<br>(n = 1296) | C/T<br>(n = 1412) | C/C<br>(n = 386) | Associations with the polymorphism |                 |                |
|-------------------------------------------------|---------------------|-------------------|-------------------|------------------|------------------------------------|-----------------|----------------|
|                                                 |                     |                   |                   |                  | Dominant model                     | Recessive model | Additive model |
| Gender (female / male)                          | 1154 / 1940         | 488 / 808         | 533 / 879         | 133 / 253        | NS                                 | NS              | NS             |
| Age (years)                                     | 61.5 ± 8.4          | 61.4 ± 8.2        | 61.7 ± 8.4        | 61.2 ± 8.8       | NS                                 | NS              | NS             |
| Duration (years)                                | 8.0 ± 7.5           | 7.9 ± 7.6         | 8.1 ± 7.5         | 7.8 ± 7.6        | NS                                 | NS              | NS             |
| Smoking (B.I. ≥200)                             | 1522 (49.2)         | 645 (49.8)        | 691 (48.9)        | 186 (48.2)       | NS                                 | NS              | NS             |
| Body mass index (kg/m <sup>2</sup> )            | 24.1 ± 3.5          | 24.2 ± 3.5        | 24.1 ± 3.5        | 24.3 ± 3.4       | NS                                 | NS              | NS             |
| HbA <sub>1c</sub> (%)                           | 7.1 ± 1.2           | 7.1 ± 1.3         | 7.0 ± 1.2         | 7.2 ± 1.4        | NS                                 | NS              | NS             |
| Presence of hypertension (%)                    | 2352 (76.0)         | 985 (76.0)        | 1066 (75.5)       | 301 (78.0)       | NS                                 | NS              | NS             |
| Presence of dyslipidemia (%)                    | 2356 (76.1)         | 993 (76.6)        | 1066 (75.5)       | 297 (76.9)       | NS                                 | NS              | NS             |
| Treatment approach for diabetes                 |                     |                   |                   |                  |                                    |                 |                |
| Diet alone                                      | 541 (17.5)          | 244 (18.8)        | 231 (16.4)        | 66 (17.1)        | NS                                 | NS              | NS             |
| Using OHA                                       | 1793 (58.0)         | 731 (56.4)        | 839 (59.4)        | 223 (57.8)       | NS                                 | NS              | NS             |
| Sulfonylureas                                   | 1097 (35.5)         | 450 (34.7)        | 516 (36.5)        | 131 (33.9)       | NS                                 | NS              | NS             |
| Thiazolidinediones                              | 368 (11.9)          | 158 (12.2)        | 165 (11.7)        | 45 (11.7)        | NS                                 | NS              | NS             |
| Biguanides                                      | 1069 (34.6)         | 466 (36.0)        | 481 (34.1)        | 122 (31.6)       | NS                                 | NS              | NS             |
| Using insulin                                   | 760 (24.6)          | 321 (24.8)        | 342 (24.2)        | 97 (25.1)        | NS                                 | NS              | NS             |
| Treatment approach for dyslipidemia             |                     |                   |                   |                  |                                    |                 |                |
| Using statins                                   | 894 (28.9)          | 378 (29.2)        | 389 (27.5)        | 127 (32.9)       | NS                                 | NS              | NS             |
| Using other drugs                               | 162 (5.2)           | 64 (4.9)          | 82 (5.8)          | 16 (4.1)         | NS                                 | NS              | NS             |
| Presence of cerebral infarction (%)             | 322 (10.4)          | 133 (10.3)        | 142 (10.1)        | 47 (12.2)        | NS                                 | NS              | NS             |

Data are shown as numbers (%) or means ± SD. In the dominant and the recessive genetic models, quantitative data between 2 groups were compared by the 2-tailed unpaired *t* test and categorical data were analyzed with the  $\chi^2$  test. In the additive genetic model, the associations between the polymorphism and variables were evaluated with one-way ANOVA or the Mantel extension test. Bonferroni's multiple comparison procedure was utilized for the correction and gave the corrected level of significance, 0.0042.

Abbreviations; NS; not significant; B.I., Brinkman's Index; OHA, oral hypoglycemic agent.

Supplementary Table 3

Clinical characteristics of the subjects divided in three genotype groups according to the number of pro-atherothrombotic alleles

| <i>G1051A</i> polymorphism of the <i>vWF</i> gene | Total<br>(n = 3094) | A/A<br>(n = 575) | A/G<br>(n = 1534) | G/G<br>(n = 985) | Associations with the polymorphism |                 |                |
|---------------------------------------------------|---------------------|------------------|-------------------|------------------|------------------------------------|-----------------|----------------|
|                                                   |                     |                  |                   |                  | Dominant model                     | Recessive model | Additive model |
| Gender (female / male)                            | 1154 / 1940         | 213 / 362        | 595 / 939         | 346 / 639        | NS                                 | NS              | NS             |
| Age (years)                                       | 61.5 ± 8.4          | 61.6 ± 8.4       | 61.4 ± 8.3        | 61.7 ± 8.5       | NS                                 | NS              | NS             |
| Duration (years)                                  | 8.0 ± 7.5           | 8.0 ± 7.5        | 7.6 ± 7.2         | 8.5 ± 8.0        | NS                                 | NS              | NS             |
| Smoking (B.I. ≥200)                               | 1522 (49.2)         | 284 (49.4)       | 748 (48.8)        | 490 (49.7)       | NS                                 | NS              | NS             |
| Body mass index (kg/m <sup>2</sup> )              | 24.1 ± 3.5          | 24.3 ± 3.6       | 24.2 ± 3.5        | 24.1 ± 3.3       | NS                                 | NS              | NS             |
| HbA <sub>1c</sub> (%)                             | 7.1 ± 1.2           | 7.0 ± 1.2        | 7.1 ± 1.2         | 7.1 ± 1.2        | NS                                 | NS              | NS             |
| Presence of hypertension (%)                      | 2352 (76.0)         | 440 (76.5)       | 1166 (76.0)       | 746 (75.7)       | NS                                 | NS              | NS             |
| Presence of dyslipidemia (%)                      | 2356 (76.1)         | 436 (75.8)       | 1175 (76.6)       | 745 (75.6)       | NS                                 | NS              | NS             |
| Treatment approach for diabetes                   |                     |                  |                   |                  |                                    |                 |                |
| Diet alone                                        | 541 (17.5)          | 94 (16.3)        | 271 (17.7)        | 176 (17.9)       | NS                                 | NS              | NS             |
| Using OHA                                         | 1793 (58.0)         | 338 (58.8)       | 878 (57.2)        | 577 (58.6)       | NS                                 | NS              | NS             |
| Sulfonylureas                                     | 1097 (35.5)         | 205 (35.7)       | 522 (34.0)        | 370 (37.6)       | NS                                 | NS              | NS             |
| Thiazolidinediones                                | 368 (11.9)          | 55 (9.6)         | 190 (12.4)        | 123 (12.5)       | NS                                 | NS              | NS             |
| Biguanides                                        | 1069 (34.6)         | 208 (36.2)       | 536 (34.9)        | 325 (33.0)       | NS                                 | NS              | NS             |
| Using insulin                                     | 760 (24.6)          | 143 (24.9)       | 385 (25.1)        | 232 (23.6)       | NS                                 | NS              | NS             |
| Treatment approach for dyslipidemia               |                     |                  |                   |                  |                                    |                 |                |
| Using statins                                     | 894 (28.9)          | 160 (27.8)       | 440 (28.7)        | 294 (29.8)       | NS                                 | NS              | NS             |
| Using other drugs                                 | 162 (5.2)           | 28 (4.9)         | 85 (5.5)          | 49 (5.0)         | NS                                 | NS              | NS             |
| Presence of cerebral infarction (%)               | 322 (10.4)          | 55 (9.5)         | 154 (10.0)        | 113 (11.5)       | NS                                 | NS              | NS             |

Data are shown as numbers (%) or means ± SD. In the dominant and the recessive genetic models, quantitative data between 2 groups were compared by the 2-tailed unpaired *t* test and categorical data were analyzed with the  $\chi^2$  test. In the additive genetic model, the associations between the polymorphism and variables were evaluated with one-way ANOVA or the Mantel extension test. Bonferroni's multiple comparison procedure was utilized for the correction and gave the corrected level of significance, 0.0042.

Abbreviations; NS; not significant; B.I., Brinkman's Index; OHA, oral hypoglycemic agent.

Supplementary Table 4

Clinical characteristics of the subjects divided in three genotype groups according to the number of pro-atherothrombotic alleles

| 4G/5G polymorphism of the <i>PAI-1</i> gene | Total       | 5G/5G      | 5G/4G       | 4G/4G      | Associations with the polymorphism |                 |                |
|---------------------------------------------|-------------|------------|-------------|------------|------------------------------------|-----------------|----------------|
|                                             | (n = 3094)  | (n = 426)  | (n = 1423)  | (n = 1245) | Dominant model                     | Recessive model | Additive model |
| Gender (female / male)                      | 1154 / 1940 | 159 / 267  | 535 / 888   | 460 / 785  | NS                                 | NS              | NS             |
| Age (years)                                 | 61.5 ± 8.4  | 61.2 ± 8.0 | 61.7 ± 8.4  | 61.4 ± 8.5 | NS                                 | NS              | NS             |
| Duration (years)                            | 8.0 ± 7.5   | 8.4 ± 8.0  | 8.1 ± 7.5   | 7.7 ± 7.5  | NS                                 | NS              | NS             |
| Smoking (B.I. ≥200)                         | 1522 (49.2) | 200 (46.9) | 699 (49.1)  | 623 (50.0) | NS                                 | NS              | NS             |
| Body mass index (kg/m <sup>2</sup> )        | 24.1 ± 3.5  | 24.1 ± 3.3 | 24.0 ± 3.5  | 24.3 ± 3.5 | NS                                 | NS              | NS             |
| HbA <sub>1c</sub> (%)                       | 7.1 ± 1.2   | 7.1 ± 1.3  | 7.1 ± 1.2   | 7.0 ± 1.2  | NS                                 | NS              | NS             |
| Presence of hypertension (%)                | 2352 (76.0) | 324 (76.1) | 1074 (75.5) | 954 (76.6) | NS                                 | NS              | NS             |
| Presence of dyslipidemia (%)                | 2356 (76.1) | 320 (75.1) | 1083 (76.1) | 953 (76.5) | NS                                 | NS              | NS             |
| Treatment approach for diabetes             |             |            |             |            |                                    |                 |                |
| Diet alone                                  | 541 (17.5)  | 75 (17.6)  | 241 (16.9)  | 225 (18.1) | NS                                 | NS              | NS             |
| Using OHA                                   | 1793 (58.0) | 245 (57.5) | 834 (58.6)  | 714 (57.3) | NS                                 | NS              | NS             |
| Sulfonylureas                               | 1097 (35.5) | 153 (35.9) | 529 (37.2)  | 415 (33.3) | NS                                 | NS              | NS             |
| Thiazolidinediones                          | 368 (11.9)  | 51 (11.9)  | 163 (11.5)  | 154 (12.4) | NS                                 | NS              | NS             |
| Biguanides                                  | 1069 (34.6) | 156 (36.6) | 435 (33.4)  | 438 (35.2) | NS                                 | NS              | NS             |
| Using insulin                               | 760 (24.6)  | 106 (24.9) | 348 (24.5)  | 306 (24.6) | NS                                 | NS              | NS             |
| Treatment approach for dyslipidemia         |             |            |             |            |                                    |                 |                |
| Using statins                               | 894 (28.9)  | 114 (26.8) | 421 (29.6)  | 359 (28.8) | NS                                 | NS              | NS             |
| Using other drugs                           | 162 (5.2)   | 20 (4.7)   | 69 (4.8)    | 71 (5.7)   | NS                                 | NS              | NS             |
| Presence of cerebral infarction (%)         | 322 (10.4)  | 38 (8.9)   | 135 (9.5)   | 149 (11.5) | NS                                 | NS              | NS             |

Data are shown as numbers (%) or means ± SD. In the dominant and the recessive genetic models, quantitative data between 2 groups were compared by the 2-tailed unpaired *t* test and categorical data were analyzed with the  $\chi^2$  test. In the additive genetic model, the associations between the polymorphism and variables were evaluated with one-way ANOVA or the Mantel extension test. Bonferroni's multiple comparison procedure was utilized for the correction and gave the corrected level of significance, 0.0042.

Abbreviations; NS; not significant; B.I., Brinkman's Index; OHA, oral hypoglycemic agent.
